# Supplementary material for: Targeted photothermal therapy of mice and rabbits realized by macrophage-loaded tungsten carbide
Source: Royal Society of Chemistry journal article supplement (doi:10.1039/c9bm00911f), 2019-01-01
Supplement: c9bm00911f1.pdf [file c9bm00911f1.pdf]

## Supplementary Data

### Targeted Photothermal Therapy on Mice and Rabbit: Realized by Macrophage Loaded Tungsten Carbide

Yan Gao, <sup>a#</sup> Weicheng Huang, <sup>b#</sup> Chunyu Yang, <sup>a</sup> Zhao Liu, <sup>c</sup> Hongxue Meng, <sup>c</sup> Bin Yang, <sup>b</sup>

Yanling Xu, <sup>\* a</sup> Chongshen Guo <sup>\* a</sup>

<sup>a</sup> School of Chemistry and Chemical Engineering, Harbin Institute of Technology, Harbin,  
150001, China

<sup>b</sup> Department of Physics, Harbin Institute of Technology, Harbin 150080, China

<sup>c</sup> Department of Ultrasound, Harbin Medical University Cancer Hospital, Harbin 150080, China.

Corresponding author: xuyanling@hit.edu.cn (Y. L. Xu)

chongshenguo@hit.edu.cn (C. S. Guo)

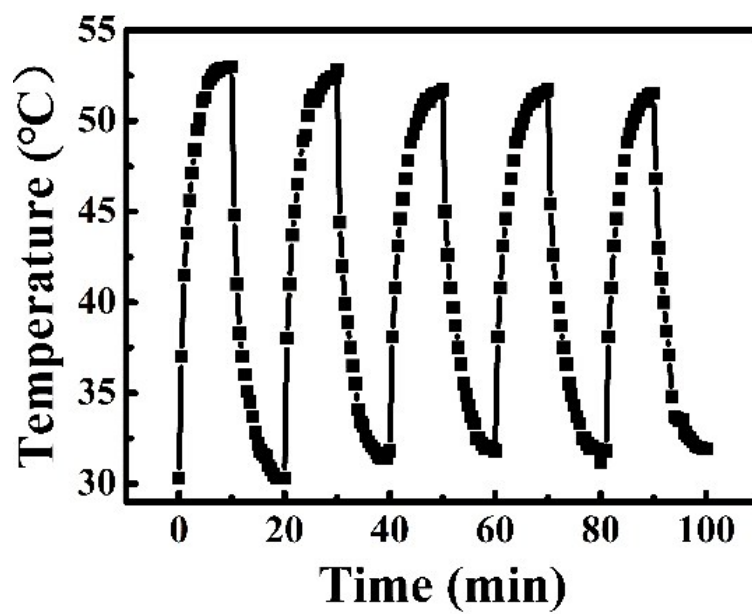

**Fig. S1.** Temperature curve of M-WC aqueous dispersion with repeated irradiation on/off cycles (880 nm, 1 W cm<sup>-2</sup>).

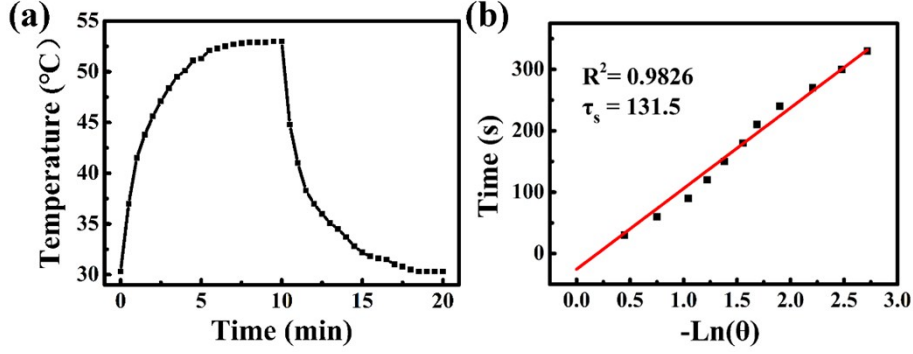

**Fig. S2.** (a) Temperature curve of the M-WC (0.5 mg/mL) dispersion under NIR irradiation and after removing the NIR, (b) the curve of  $-\ln(\theta)$  versus Time.

To further assess the photothermal performance of M-WC, the photothermal conversion efficiency ( $\eta$ ) was quantified according to following equation.<sup>S1,S2</sup>

$$\eta = [hS(T_{max} - T_{surr}) - Q_{dis}] / I(1 - 10^{-A_{880}}) \quad \text{Equation S1}$$

where  $h$  is heat transfer coefficient,  $S$  is the surface area of the container,  $T_{max}$  is the equilibrium temperature (53 °C),  $T_{surr}$  is ambient temperature of the surroundings (31.1 °C),  $Q_{dis}$  is heat dissipated from light absorbed by the quartz sample cell itself (11.34 mW),  $I$  is incident laser power (1 W cm<sup>-2</sup>),  $A_{880}$  is the optical absorbance of nanoparticles at 880 nm (1.452).

In order to obtain the value of  $hS$ , a dimensionless driving force temperature  $\theta$  was introduced:

$$\theta = (T - T_{surr}) / (T_{max} - T_{surr}) \quad \text{Equation S2}$$

M-WC were continuously irradiated for 10 min, followed by natural cooling to room temperature for 10 min. According to the cooling curve in **Figure R3a**, the curve of  $-\ln(\theta)$  versus time were obtained (**Figure R3b**). The cooling time  $t$  and  $\theta$  abide by the following equation S3:

$$t = -\tau_s \ln(\theta) \quad \text{Equation S3}$$

In this way, the time constant ( $\tau_s$ ) was calculated to be 131.5s.

The value of  $hS$  can be calculated by the following equation:

$$hS = \Sigma mCp / \tau_s \quad \text{Equation S4}$$

Where  $m$  is the mass (0.5 g),  $C_p$  is heat capacity of water (4.2 J/g) and  $\tau_s$  is time constant, respectively. Thus, the photothermal conversion efficiency value was determined to be 25.8%.

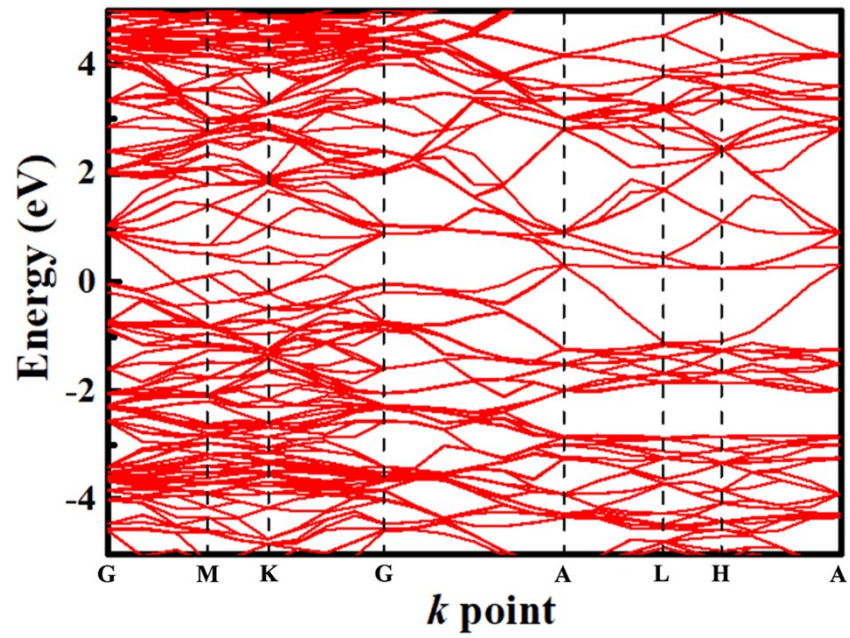

**Fig. S3.** Band structure was calculated along the specific path: G-M-K-G-A-L-H-A of WC hexagonal lattice.

**Table S1.** The DFT calculated atomic Mulliken populations.

| <b>Atom Species</b> | <b>s</b> | <b>p</b> | <b>d</b> | <b>Net Charge (e)</b> |
|---------------------|----------|----------|----------|-----------------------|
| C1                  | 1.38     | 3.22     | 0        | -0.6                  |
| C2                  | 1.38     | 3.22     | 0        | -0.6                  |
| C3                  | 1.38     | 3.22     | 0        | -0.6                  |
| C4                  | 1.38     | 3.22     | 0        | -0.6                  |
| C5                  | 1.38     | 3.22     | 0        | -0.6                  |
| C6                  | 1.38     | 3.22     | 0        | -0.6                  |
| C7                  | 1.38     | 3.22     | 0        | -0.6                  |
| C8                  | 1.38     | 3.22     | 0        | -0.61                 |
| C9                  | 1.38     | 3.22     | 0        | -0.6                  |
| C10                 | 1.38     | 3.22     | 0        | -0.6                  |
| C11                 | 1.38     | 3.22     | 0        | -0.6                  |
| C12                 | 1.38     | 3.22     | 0        | -0.6                  |
| C13                 | 1.38     | 3.22     | 0        | -0.6                  |
| C14                 | 1.38     | 3.22     | 0        | -0.6                  |
| C15                 | 1.38     | 3.22     | 0        | -0.6                  |
| C16                 | 1.38     | 3.22     | 0        | -0.61                 |
| C17                 | 1.38     | 3.22     | 0        | -0.6                  |
| C18                 | 1.38     | 3.22     | 0        | -0.6                  |
| C19                 | 1.38     | 3.22     | 0        | -0.6                  |
| C20                 | 1.38     | 3.22     | 0        | -0.6                  |
| C21                 | 1.38     | 3.22     | 0        | -0.6                  |
| C22                 | 1.38     | 3.22     | 0        | -0.6                  |
| C23                 | 1.38     | 3.22     | 0        | -0.6                  |
| C24                 | 1.38     | 3.22     | 0        | -0.6                  |
| C25                 | 1.38     | 3.22     | 0        | -0.6                  |
| C26                 | 1.38     | 3.22     | 0        | -0.6                  |
| C27                 | 1.38     | 3.22     | 0        | -0.6                  |
| C28                 | 1.38     | 3.22     | 0        | -0.6                  |
| C29                 | 1.38     | 3.22     | 0        | -0.6                  |
| C30                 | 1.38     | 3.22     | 0        | -0.6                  |
| C31                 | 1.38     | 3.22     | 0        | -0.6                  |
| C32                 | 1.38     | 3.22     | 0        | -0.6                  |
| W1                  | 2.46     | 6.53     | 4.41     | 0.61                  |

|     |      |      |      |      |
|-----|------|------|------|------|
| W2  | 2.46 | 6.53 | 4.41 | 0.6  |
| W3  | 2.46 | 6.53 | 4.41 | 0.61 |
| W4  | 2.46 | 6.53 | 4.41 | 0.6  |
| W5  | 2.46 | 6.53 | 4.41 | 0.61 |
| W6  | 2.46 | 6.53 | 4.41 | 0.6  |
| W7  | 2.46 | 6.53 | 4.41 | 0.6  |
| W8  | 2.46 | 6.53 | 4.41 | 0.61 |
| W9  | 2.46 | 6.53 | 4.41 | 0.61 |
| W10 | 2.46 | 6.53 | 4.41 | 0.6  |
| W11 | 2.46 | 6.53 | 4.41 | 0.6  |
| W12 | 2.46 | 6.53 | 4.41 | 0.6  |
| W13 | 2.46 | 6.53 | 4.41 | 0.6  |
| W14 | 2.46 | 6.53 | 4.41 | 0.6  |
| W15 | 2.46 | 6.53 | 4.41 | 0.6  |
| W16 | 2.46 | 6.53 | 4.41 | 0.61 |
| W17 | 2.46 | 6.53 | 4.41 | 0.6  |
| W18 | 2.46 | 6.53 | 4.41 | 0.61 |
| W19 | 2.46 | 6.53 | 4.41 | 0.6  |
| W20 | 2.46 | 6.53 | 4.41 | 0.6  |
| W21 | 2.46 | 6.53 | 4.41 | 0.61 |
| W22 | 2.46 | 6.53 | 4.41 | 0.6  |
| W23 | 2.46 | 6.53 | 4.41 | 0.6  |
| W24 | 2.46 | 6.53 | 4.41 | 0.6  |
| W25 | 2.46 | 6.53 | 4.41 | 0.6  |
| W26 | 2.46 | 6.53 | 4.41 | 0.61 |
| W27 | 2.46 | 6.53 | 4.41 | 0.61 |
| W28 | 2.46 | 6.53 | 4.41 | 0.6  |
| W29 | 2.46 | 6.53 | 4.41 | 0.61 |
| W30 | 2.46 | 6.53 | 4.41 | 0.6  |
| W31 | 2.46 | 6.53 | 4.41 | 0.6  |
| W32 | 2.46 | 6.53 | 4.41 | 0.6  |

---

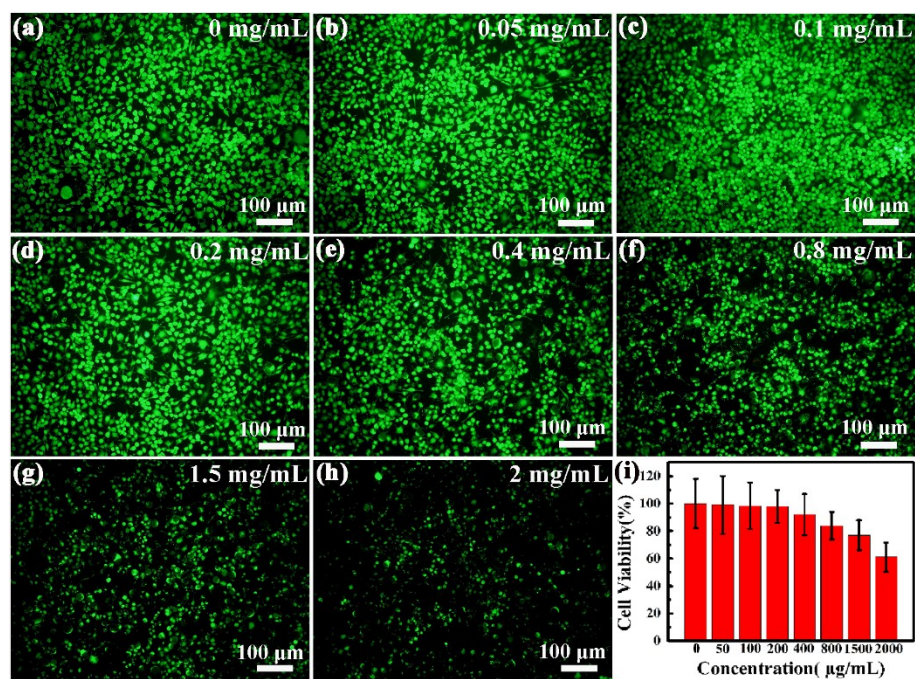

**Fig. S4.** (a) - (h) Calcein AM staining for the observation of living macrophage after incubation with varied concentration of WC, (i) Relative cell viability after treated with various concentrations of M-WC.



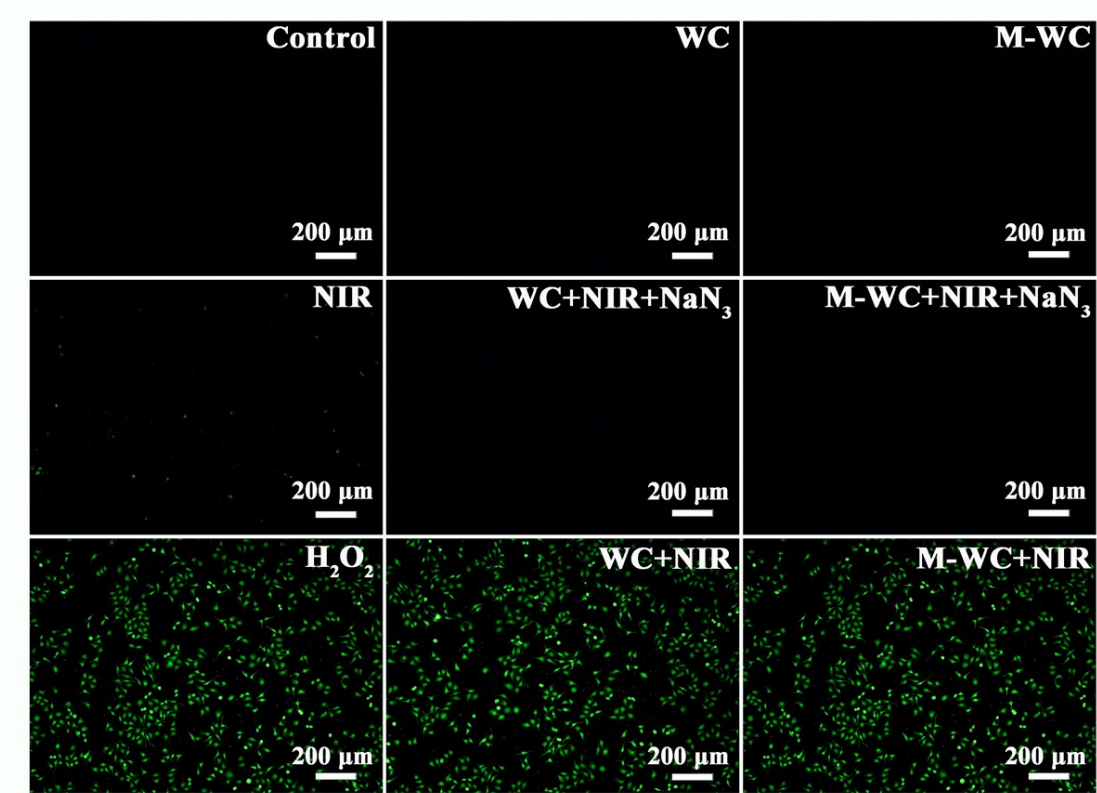

**Fig. S5.** Fluorescence microscope images of ROS generation determined by the H<sub>2</sub>DCFDA probe.

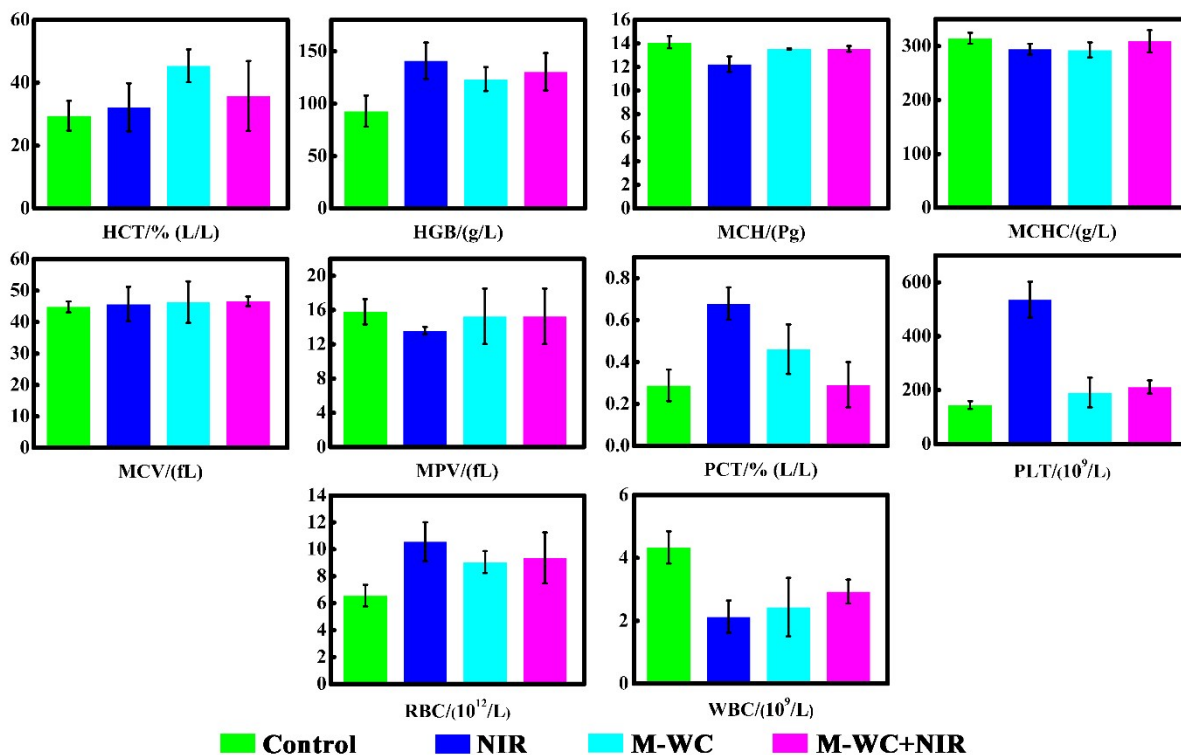

Fig. S6. Hemanalysis results of all the mice in different groups.

## References

- S1. M. F. Wang, K. R. Deng, W. Lu, X. R. Deng, K. Li, Y. S. Shi, B. B. Ding, Z. Y. Cheng, B. G. Xing, G. Han, Z. Y. Hou and J. Lin, *Adv. Mater.*, 2018, **30**, 1706747.
- S2. C. B. Leng, X. Zhang, F. X. Xu, Y. Yuan, H. Pei, Z. H. Sun, L. Li and Z. H. Bao, *Small*, 2018, **14**, 1703077.
